# Supplementary material for: Determinants of Time to Treatment Dropout among Tuberculosis Patients in Buno-Bedele and Illu Ababora Zones, Oromia Regional State, Ethiopia
Source: Research Square preprint supplement (doi:10.21203/rs.3.rs-322443/v1), 2021-04-30
Supplement: Supplementary file 1 [file 8b2aee055270b0097d98b09c.docx]

Table S1: Results of Cox PH Analysis on time to treatment dropout of TB patients

| **Covariates** | **Haz. Ratio** | **Std. Err.** | **z** | **P>z** | **[95% Conf. Interval]** | |
| --- | --- | --- | --- | --- | --- | --- |
| Age | 0.9896617 | .0033516 | -3.07 | 0.002 | 0.9831144 | .9962526 |
| Phase of TB treatment | 1.088068 | .1161647 | 0.79 | 0.429 | 0.8826323 | 1.34132 |
| HIV Co-infection | 1.756786 | .4096811 | 2.42 | 0.016 | 1.112293 | 2.774715 |
| DM | 1.40302 | .3145673 | 1.51 | 0.131 | .9041041 | 2.177256 |
| Cancer | 0.7838992 | .2104713 | -0.91 | 0.365 | .4631469 | 1.326789 |
| Anaemia | 1.789683 | .4528684 | 2.30 | 0.021 | 1.089895 | 2.938783 |
| _cons | .0000665 | .0000225 | -28.40 | 0.000 | .0000342 | .0001291 |

Table S2: Test of proportional-hazards assumption

| **Time** | **Chi-square** |  | **Df** | **Prob>chi2** |
| --- | --- | --- | --- | --- |
| Global test | 5.68 |  | 6 | 0.4596 |

Table S3: The AIC value for different parametric regression models

| **Models** | **df** | **AIC** |
| --- | --- | --- |
| Weibull | 8 | -193.3409 |
| Exponential | 7 | 786.4411 |
| Log logistic | 8 | -180.593 |
| Lognormal | 8 | 180.9377 |
| Gompertz | 8 | -172.449 |
